# Supplementary material
Source: publisher figshare collection journal article supplement (https://tandf.figshare.com/ndownloader/files/15653777)
Supplement: Supplementary file 1 [file 15653777]

***Supporting information for***

Spectroscopic Characterization and *in Silico* Modelling of Polyvinylpyrrolidone as an Anion-Responsive Fluorescent Polymer in Aqueous Media

Hiu C. Kama,b, Dineli T. S. Ranathungaa,b, Ethan R. Paynea, Ronald A. Smaldonea, Steven O. Nielsena, and Sheel C. Dodani*a

[a]Department of Chemistry and Biochemistry, The University of Texas at Dallas, Richardson, TX 75080

[b]H.C.K. and D.T.S.R contributed equally to this work

*E-mail: sheel.dodani@utdallas.edu

**Figure S1.** Anion screening of PVP40 fluorescence response in ultrapure water. Fluorescence excitation (em = 390 nm, red) and emission (ex = 310 nm, blue) response of 1 wt% PVP40 to 0 and 100 mM (bold) (a) sodium citrate, (b) sodium sulfate, (c) sodium phosphate, (d) sodium acetate, (e) sodium chloride, (f) potassium chloride (g) sodium nitrite, (h) sodium nitrate, (i) sodium chlorate, (j) sodium bromide, (k) sodium iodide, and (l) potassium thiocyanate. Arrow direction corresponds to increasing anion concentrations. The average of three technical replicates with standard deviation is reported.

**Figure S2.** Emission response at 390 nm of 1 wt% PVP40 in ultrapure water to 0 (F0, black bar) and 100 mM (Ff, grey bar) for the anions tested in Figure S1. The average of three technical replicates with standard deviation is reported.

**Figure S3.** Fluorescence excitation (em = 390 nm, red) and emission (ex = 310 nm, blue) response of 1 wt% PVP40 to anions as a function of pH. Spectra were acquired in (a) 50 mM sodium citrate buffer (pH 4), (b) 50 mM sodium citrate buffer (pH 6), and (c) 50 mM potassium phosphate buffer (pH 8) in the presence of 0, 25, 50, 100, 200, and 400 mM (bold) nitrite, nitrate, iodide, and thiocyanate. Arrow direction corresponds to increasing anion concentrations. The average of three technical replicates with standard deviation is reported.

**Figure S4.** Emission response at 390 nm of PVP40 in (a) 50 mM sodium citrate buffer (pH 4), (b) 50 mM sodium citrate buffer (pH 6), and (c) 50 mM potassium phosphate buffer (pH 8) to 0, 25, 50, 100, 200 and 400 mM of the anions tested in Figure S3. The average of three technical replicates with standard deviation is reported. The curve fits used to determine the apparent dissociation constants are included.

**Table S1.** Summary of the emission response for PVP40 to anions as function of pH. Fractional quenching (Ff/F0) and apparent dissociation constants (*K*d) of 1 wt% PVP40 in 50 mM sodium citrate buffer (pH 4), 50 mM sodium citrate buffer (pH 6), and 50 mM potassium phosphate buffer (pH 8) in the presence of 0 (F0), 25, 50, 100, 200, and 400 mM (Ff) nitrite, nitrate, iodide, and thiocyanate. The average of three technical replicates with standard deviation (S.D.) is reported. All spectra and binding curves are shown in Figures S3 and S4, respectively.

**Figure S5.** Fluorescence excitation (em = 390 nm, red) and emission (ex = 310 nm, blue) response of (a) 1 wt% K15 and (b) 1 wt% K90 in 50 mM sodium citrate pH 6. Spectra were acquired in the presence of 0, 25, 50, 100, 200, and 400 mM (bold) nitrite, nitrate, iodide, and thiocyanate. Arrow direction corresponds to increasing anion concentrations. The average of three technical replicates with standard deviation of the mean is reported.

**Figure S6.** Emission response at 390 nm of 1 wt% (a) K15 and (b) K90 in 50 mM sodium citrate buffer (pH 6) to 0, 6.25, 12.5, 25, 50, 100, and 400 mM of the anions tested in Figure S5. The average of three technical replicates with standard deviation is reported. The curve fits used to determine the apparent dissociation constants are included.

**Table S2.** Summary of the emission response for PVP to anions as a function of molecular weight. Fractional quenching (Ff/F0) and apparent dissociation constants (*K*d) of 1 wt% PVP K15, PVP40, and PVP K90 in 50 mM sodium citrate buffer (pH 6) in the presence of 0 (F0), 25, 50, 100, 200, and 400 mM (Ff)nitrite, nitrate, iodide, and thiocyanate. The average of three technical replicates with standard deviation is reported. All spectra and binding curves are shown in Figure S5 and S6, respectively.

**Figure S7.** (a) Representative initial model of nine linear PVP chains (green) and sulfate system along the x-direction in a 3 x 3 bundle geometry. (b) Equilibrated/relaxed structure after 10 ns. Coloring scheme is as follows: sulfur (yellow), oxygen (red), sodium (pink), and water (transparent blue).

**Table S3.** Force field parameters for the ions tested.

**Figure S8.** Electrostatic potential map of the PVP monomer determined by the VMD PMEpot plugin. The blue isodensity surface represents a large negative density and the red isodensity surface represents the corresponding positive density of the same magnitude.

**Table S4.** Spatial distribution of anions within a cutoff distance of 10 Å from the PVP monomer. The color represents the anion density where gray is 0.05, silver 0.15, ice-blue 0.50, magenta 1.50, blue 2.50, green 3.50, yellow 4.50, orange 5.50, red 6.50, purple 7.50, and white and black alternates by 1 atom/Å3 after 8.50 atoms/Å3.

**Table S5.** Determination of the number of pyrrolidone units in 1 wt% of each PVP tested given a molecular weight of 111.14 g/mol for each N-vinyl pyrrolidone unit (n).


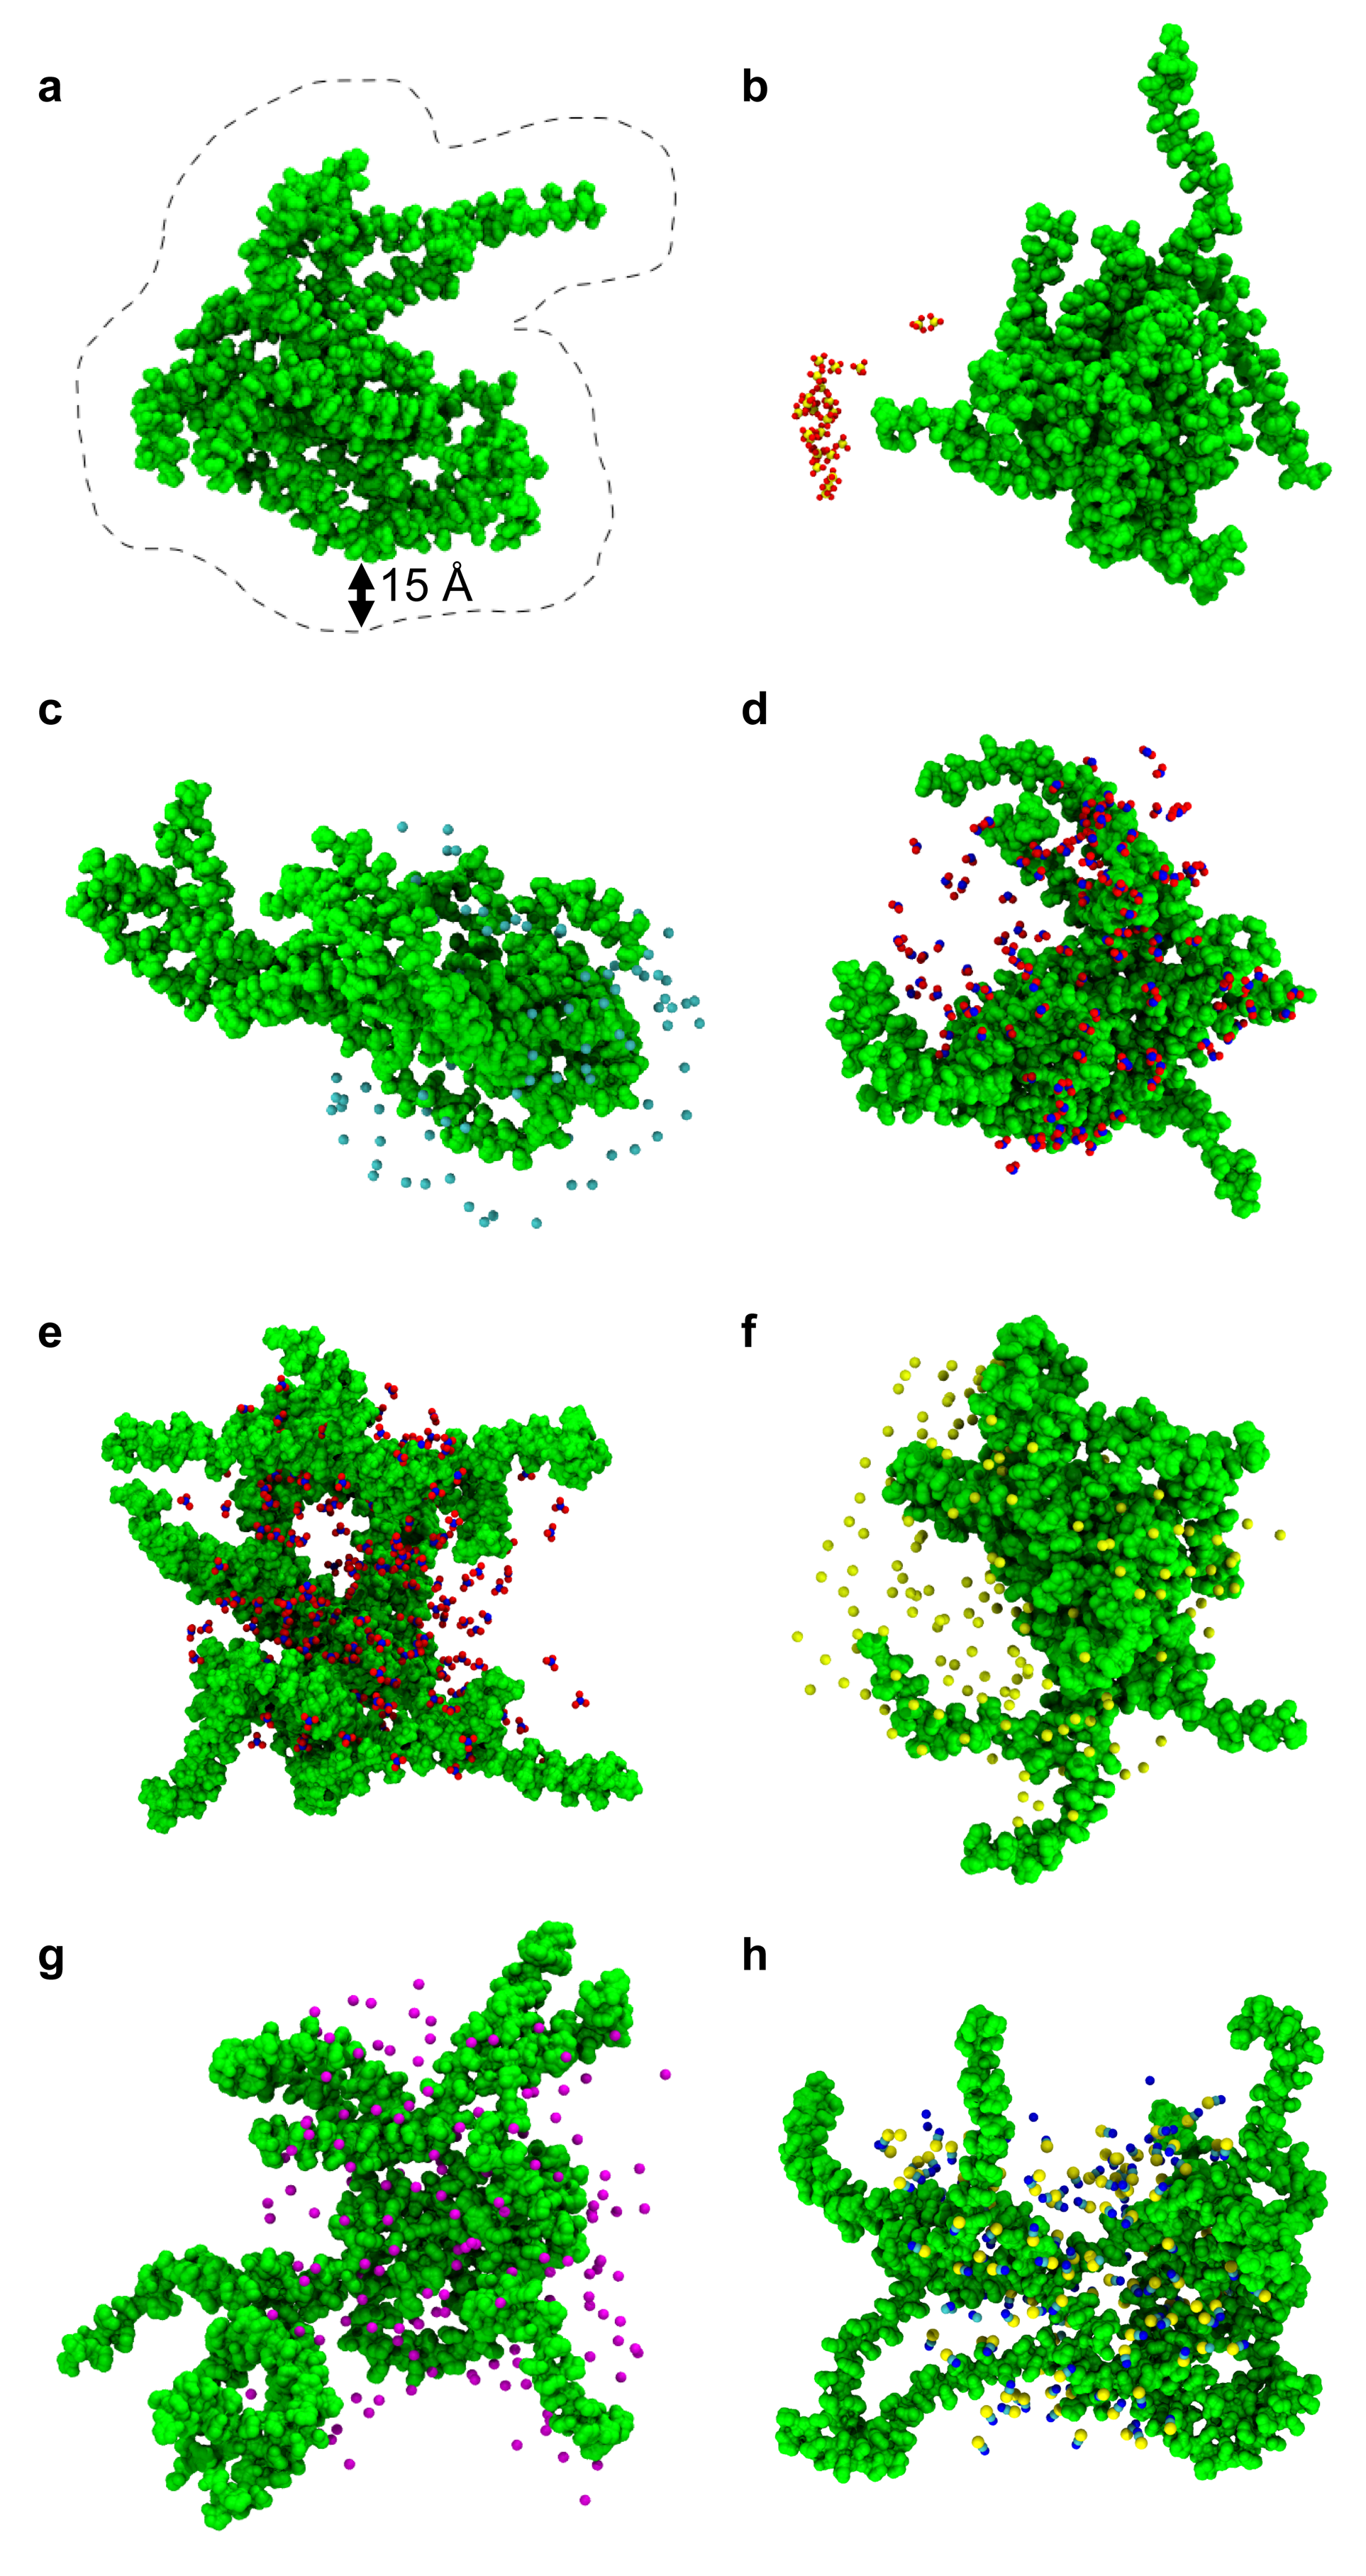


**Figure S9.** Trajectory snapshots show (a) ions within 15 Å of PVP for (b) sulfate, (c) chloride, (d) nitrite, (e) nitrate, (f) bromide, (g) iodide, and (h) thiocyanate systems. Coloring scheme is as follows: PVP (green), nitrogen (blue), oxygen (red), sulfur (yellow), chloride (cyan), bromide (yellow-lime), and iodide (magenta).

**Figure S10.** Radial distributions functions (RDFs, g(r)) of center of mass of ions around (a) N (blue), C (cyan) and O (red) atoms of PVP for (b) sulfate, (c) chloride, (d) nitrite, (e) nitrate, (f) bromide, (g) iodide, and (h) thiocyanate systems.

**Figure S11.** (a) Radial distributions functions (RDFs, g(r)) of water around sulfate (red), chloride (dark blue), nitrite (purple), nitrate (green), bromide (yellow), iodide (orange), and thiocyanate (light blue) versus radial distance (r). (b) RDFs of anion around the same anion, (c) sodium ions around anions, and (D) sodium ions around PVP.

**Figure S12.** Change in time-averaged solvent accessible surface area (SASA) of PVP in the presence of different anions. Percent change shown compared to PVP in water of 40863 Å2.
